# Supplementary material for: Ethyl Acetate Fractions of Papaver rhoeas L. and Papaver nudicaule L. Exert Antioxidant and Anti-Inflammatory Activities
Source: MDPI journal article supplement (doi:10.3390/antiox10121895), 2021-11-26
Supplement: s1 [file s1]

Table S1. Identification of chemical components authentically or tentatively in EtOH extracts and EtOAc fractions of *P. nudicaule* and *P. rhoeas* from using LC-ESI-QTOF MS/MS

| No. | Name                        | Formula   | mass (Da) | Expected RT (min) | Adduct             | Found at mass (Da) | Error (ppm) | MS/MS product ions                               | Identified with |
|-----|-----------------------------|-----------|-----------|-------------------|--------------------|--------------------|-------------|--------------------------------------------------|-----------------|
| 1   | Demethylcoclaurine          | C16H17NO3 | 271.12084 | 5.02              | [M+H] <sup>+</sup> | 272.1283           | 0.1         | 107.0495, 255.1023, 161.0605, 143.0498           | †               |
| 2   | Armepavine                  | C19H23NO3 | 313.16779 | 5.60              | [M+H] <sup>+</sup> | 314.1743           | -1.8        | 298.1074, 226.0860, 299.1161, 211.0748           | [22]            |
| 3   | Coclaurine                  | C17H19NO3 | 285.13649 | 6.06              | [M+H] <sup>+</sup> | 286.1439           | 0.5         | 107.0497, 269.1172, 175.0751, 237.0920, 209.0946 | †               |
| 4   | N-methylcoclaurine          | C18H21NO3 | 300.1599  | 6.12              | [M+H] <sup>+</sup> | 300.1596           | 0.7         | 107.0499, 269.1174, 175.0755, 237.0917, 137.0593 | [37]            |
| 5   | Papaverrubine X1            | C21H23NO6 | 385.1525  | 6.64              | [M+H] <sup>+</sup> | 386.1598           | -0.1        | 368.1494, 297.1133, 206.1174, 266.0922, 223.0744 | [37]            |
| 6   | Reticuline                  | C19H23NO4 | 329.16271 | 6.74              | [M+H] <sup>+</sup> | 330.1696           | -1.1        | 192.1017, 137.0582, 299.1256, 177.0804           | †               |
| 7   | Cheilanthisfoline           | C19H19NO4 | 325.13141 | 7.68              | [M+H] <sup>+</sup> | 326.1387           | 0.1         | 178.0859, 163.0635, 151.0742, 190.0854           | [37]            |
| 8   | Tetrahydrocolumbamine       | C20H23NO4 | 341.16271 | 8.37              | [M+H] <sup>+</sup> | 342.1703           | 1.0         | 178.0869, 163.0632, 151.0755, 176.0707           | †               |
| 9   | Papaverrubine X2            | C21H23NO6 | 385.1525  | 8.65              | [M+H] <sup>+</sup> | 386.1598           | 0.1         | 368.1483, 206.1170, 190.0859, 336.1223           | [37]            |
| 10  | Rotundine                   | C21H25NO4 | 355.17836 | 8.84              | [M+H] <sup>+</sup> | 356.1853           | -1.0        | 192.1017, 177.0782, 148.0758                     | [22]            |
| 11  | Cryptopine                  | C21H23NO5 | 369.1576  | 9.01              | [M+H] <sup>+</sup> | 370.1651           | 0.4         | 204.1021, 205.1102, 190.0865, 165.0914           | [37]            |
| 12  | Protopine                   | C20H19NO5 | 353.12632 | 9.25              | [M+H] <sup>+</sup> | 354.1337           | 0.2         | 188.0708, 189.0783, 149.0595, 275.0708           | †               |
| 13  | Muramine                    | C22H27NO5 | 385.18892 | 9.89              | [M+H] <sup>+</sup> | 386.1964           | 0.6         | 204.1022, 165.0909, 306.1258, 368.1865, 222.1126 | [22]            |
| 14  | Rhoeagenine                 | C20H19NO6 | 369.12124 | 10.20             | [M+H] <sup>+</sup> | 370.1285           | 0.0         | 352.1175, 190.0858, 188.0701, 320.0912, 321.0753 | [22]            |
| 15  | Allocryptopine              | C21H23NO5 | 369.1576  | 10.23             | [M+H] <sup>+</sup> | 370.1646           | -0.7        | 352.1181, 190.0857, 188.0701, 320.0913, 291.0649 | †               |
| 16  | N_methylstylopine           | C20H20NO4 | 338.13923 | 10.23             | [M] <sup>+</sup>   | 338.1387           | -0.7        | 190.0860, 188.0703, 149.0595, 249.0910, 189.0769 | [37]            |
| 17  | Tetrahydropalmatine         | C21H25NO4 | 355.17836 | 10.47             | [M+H] <sup>+</sup> | 356.1860           | 0.9         | 192.1024, 165.0916, 176.0713, 177.0792           | †               |
| 18  | Rhoadine                    | C21H21NO6 | 383.13689 | 10.52             | [M+H] <sup>+</sup> | 384.1442           | -0.4        | 352.1192, 190.0861, 188.0705, 320.0924, 303.0676 | [22]            |
| 19  | Stylopine                   | C19H17NO4 | 323.11576 | 10.85             | [M+H] <sup>+</sup> | 324.1231           | 0.2         | 176.0703, 149.0592, 91.0546                      | †               |
| 20  | N-trans-p-Coumaroyltyramine | C17H17NO3 | 283.12084 | 11.34             | [M+H] <sup>+</sup> | 284.1282           | 0.1         | 147.0439, 121.0645, 119.0496, 91.0558            | #               |
| 21  | Orientalidine               | C22H23NO6 | 397.15254 | 11.46             | [M+H] <sup>+</sup> | 398.1597           | -0.4        | 382.1279, 336.1231, 364.1174, 193.0851           | *               |
| 22  | Corydaine                   | C22H27NO4 | 369.19401 | 12.16             | [M+H] <sup>+</sup> | 370.2015           | 0.5         | 192.1021, 165.0912, 150.0677, 176.0707, 354.1705 | †               |
| 23  | Thebaine                    | C19H21NO3 | 311.15214 | 12.74             | [M+H] <sup>+</sup> | 312.1596           | 0.7         | 252.0782, 251.1063, 223.1117, 281.1173           | [38]            |
| 24  | Sanguinarine                | C20H14NO4 | 332.09228 | 12.85             | [M] <sup>+</sup>   | 332.0918           | -1.6        | 304.0960, 274.0867, 246.0924, 317.0697, 218.0958 | †               |
| 25  | Palmatine                   | C21H22NO4 | 352.15488 | 13.80             | [M] <sup>+</sup>   | 352.1546           | -1.0        | 336.1224, 322.1072, 308.1280, 337.1307           | [38]            |
| 26  | Hydroxysanguinarine         | C20H13NO5 | 347.07937 | 17.70             | [M+H] <sup>+</sup> | 348.0868           | 0.5         | 333.0638, 305.0690, 320.0926, 98.9848            | *               |
| 27  | Dihydrosanguinarine         | C20H15NO4 | 333.10011 | 19.03             | [M+H] <sup>+</sup> | 334.1068           | -1.2        | 318.0755, 319.0832, 276.1053, 304.0965           | †               |

† Reference standard

# In-house ms/ms library and online database; such as GNPS, MASS bank or Metlin

\* Monoisotope Mass
